# Supplementary material for: Long-Lasting WNT-TCF Response Blocking and Epigenetic Modifying Activities of Withanolide F in Human Cancer Cells
Source: PubMed Central journal article supplement (PMC5156407; doi:10.1371/journal.pone.0168170), 2016-12-14
Supplement: pone.0168170.s008.pdf [file pone.0168170.s008.pdf]

| CAP2 vs. Control |                                                                                                                                       |      |                            |       |
|------------------|---------------------------------------------------------------------------------------------------------------------------------------|------|----------------------------|-------|
|                  | UP                                                                                                                                    | DOWN |                            |       |
|                  | HIST1H2BD                                                                                                                             | 52   | SYNCRIP                    | -34.0 |
|                  | ALDH8A1                                                                                                                               | 29   | NMI                        | -32.3 |
|                  | HIST1H2AB /// HIST1H2AE                                                                                                               | 27   | ZMYND8                     | -28.5 |
|                  | TTC18                                                                                                                                 | 25   | SLC16A14                   | -27.8 |
|                  | HIST1H2AG /// HIST1H2AH /// HIST1H2AI /// HIST1H2AK /// HIST1H2AL /// HIST1H2AM                                                       | 24   | VAV3                       | -27.2 |
|                  | NCALD                                                                                                                                 | 23   | RFKAP                      | -24.8 |
|                  | ERVK3-2 /// LOC100506358                                                                                                              | 23   | KIT                        | -23.8 |
|                  | NPR3                                                                                                                                  | 22   | SRSF1                      | -21.5 |
|                  | NOV                                                                                                                                   | 21   | SPC25                      | -21.1 |
|                  | CCL4 /// CCL4L1 /// CCL4L2 /// LOC101060278                                                                                           | 20   | PRIL1                      | -20.7 |
|                  | SERPINC1                                                                                                                              | 19   | ARMCK5                     | -20.0 |
|                  | EGR1                                                                                                                                  | 19   | PTPRO                      | -19.3 |
|                  | HIST2H2BE                                                                                                                             | 18   | ELK3                       | -18.6 |
|                  | HIST1H2BC /// HIST1H2BE /// HIST1H2BF /// HIST1H2BG /// HIST1H2BI /// NCALD                                                           | 18   | PKC1                       | -18.1 |
|                  | SLC17A8                                                                                                                               | 15   | SH3PX2A                    | -18.0 |
|                  | HIST2H2AA3 /// HIST2H2AA4                                                                                                             | 15   | CXCL3                      | -17.9 |
|                  | HIST1H1C                                                                                                                              | 14   | FAIM                       | -17.9 |
|                  | SSR1                                                                                                                                  | 14   | KLHL23 /// PHOSPHO2-KLHL23 | -17.8 |
|                  | MDM2                                                                                                                                  | 13   | GJA1                       | -17.3 |
|                  | HIST1H2BC /// HIST1H2BE /// HIST1H2BF /// HIST1H2BG /// HIST1H2BI                                                                     | 13   | DCAF16                     | -17.2 |
|                  | OSGIN1                                                                                                                                | 13   | GCNT3                      | -16.9 |
|                  | FBXO11                                                                                                                                | 12   | ITPR1PL2                   | -16.3 |
|                  | CDKL2                                                                                                                                 | 12   | ADORA2B                    | -16.2 |
|                  | LTBR                                                                                                                                  | 12   | MLKL                       | -15.7 |
|                  | GLS                                                                                                                                   | 12   | HNF4G                      | -15.5 |
|                  | ADRBK2                                                                                                                                | 11   | PLEKH2                     | -15.5 |
|                  | CYP2C9                                                                                                                                | 11   | STEAP1                     | -15.5 |
|                  | PLGLA /// PLGLB1 /// PLGLB2                                                                                                           | 11   | TRAF5                      | -15.3 |
|                  | GUCA1B                                                                                                                                | 11   | SORSB2                     | -15.2 |
|                  | 1H4D /// HIST1H4E /// HIST1H4F /// HIST1H4H /// HIST1H4I /// HIST1H4J /// HIST1H4K /// HIST1H4L /// HIST2H4A /// HIST2H4B /// HIST4H4 | 11   | LG85                       | -15.1 |
|                  | WDR96                                                                                                                                 | 10   | POLE2                      | -15.1 |
|                  | LSMEM1                                                                                                                                | 10   | PRMT6                      | -14.3 |
|                  | TNFSF13B                                                                                                                              | 10   | KBTBD11                    | -14.3 |
|                  | TICAM2 /// TMED7-TICAM2                                                                                                               | 10   | PPP1R9A                    | -14.2 |
|                  | ARRDC4                                                                                                                                | 10   | PDGFC                      | -14.1 |
|                  | ATF3                                                                                                                                  | 10   | QSER1                      | -14.0 |
|                  | SRXN1                                                                                                                                 | 10   | FUT3                       | -13.9 |
|                  | SCG5                                                                                                                                  | 10   | ZBTB38                     | -13.8 |
|                  | TDRD6                                                                                                                                 | 9    | MYB                        | -13.6 |
|                  | CD200R1                                                                                                                               | 9    | MAGEF1                     | -13.6 |
|                  | ACTG1P4 /// AMY1A /// AMY1B /// AMY1C /// AMY2A /// AMY2B                                                                             | 9    | AIM1                       | -13.5 |
|                  | MSH4                                                                                                                                  | 9    | KIAA0226L                  | -13.5 |
|                  | SCARNA14                                                                                                                              | 9    | RABGAP1L                   | -13.0 |
|                  | SOX30                                                                                                                                 | 9    | UTRN                       | -13.0 |
|                  | ACTC1                                                                                                                                 | 9    | DIXDC1                     | -13.0 |
|                  | PRDM2                                                                                                                                 | 9    | SCAMP1                     | -12.8 |
|                  | CDKN1A                                                                                                                                | 9    | EFNA4                      | -12.8 |
|                  | MYRFL                                                                                                                                 | 8    | IL33                       | -12.7 |
|                  | DHRS2                                                                                                                                 | 8    | ZNF165                     | -12.5 |
|                  | ITGAM                                                                                                                                 | 8    | TM4SF1                     | -12.5 |
|                  | ITGA9                                                                                                                                 | 8    | PTGDR                      | -12.4 |
|                  | RNF150                                                                                                                                | 8    | SPIN4                      | -12.2 |
|                  | LRRC8C                                                                                                                                | 8    | SMARCAD1                   | -12.1 |
|                  | CHRNA10                                                                                                                               | 8    | TRMT11                     | -12.0 |
|                  | HIST1H2BK                                                                                                                             | 7    | SP100                      | -11.8 |
|                  | HIST1H2BI                                                                                                                             | 7    | PHLDA1                     | -11.7 |
|                  | HIST1H2AC                                                                                                                             | 7    | SUTRK6                     | -11.7 |
|                  | CORIN                                                                                                                                 | 7    | POLR3G                     | -11.6 |
|                  | RASA4 /// RASA4B                                                                                                                      | 7    | CXCL1                      | -11.5 |
|                  | LAT2                                                                                                                                  | 7    | IRF2BP2                    | -11.5 |
|                  | LDHAL6B                                                                                                                               | 7    | ANKRD22                    | -11.4 |
|                  | HIST1H3A /// HIST1H3B /// HIST1H3C /// HIST1H3D /// HIST1H3E /// HIST1H3F /// HIST1H3G /// HIST1H3H /// HIST1H3I /// HIST1H3J         | 7    | N4BP2L2                    | -11.4 |
|                  | PLAGL1                                                                                                                                | 7    | KCNK4                      | -11.3 |
|                  | MBP                                                                                                                                   | 7    | PAIP1                      | -11.3 |
|                  | ALLC                                                                                                                                  | 7    | TUBBP5                     | -11.3 |
|                  | BTG2                                                                                                                                  | 7    | ZCCHC10                    | -11.3 |
|                  | CCDC11                                                                                                                                | 7    | LGALS8                     | -11.3 |
|                  | ZNF211                                                                                                                                | 7    | CASD1                      | -11.3 |
|                  | PYGM                                                                                                                                  | 7    | EMG1                       | -11.2 |
|                  | RHOB                                                                                                                                  | 7    | C2CD2                      | -11.2 |
|                  | SERTAD1                                                                                                                               | 7    | USP46                      | -11.1 |
|                  | NFYA                                                                                                                                  | 6    | TRABD2A                    | -11.1 |
|                  | ERRFI1                                                                                                                                | 6    | WDFY3                      | -11.0 |
|                  | TXK                                                                                                                                   | 6    | CMPK2                      | -10.9 |
|                  | SRP19 /// ZRSR1                                                                                                                       | 6    | STEAP2                     | -10.9 |
|                  | KIAA1683                                                                                                                              | 6    | RIMBP2                     | -10.9 |
|                  | TLL2                                                                                                                                  | 6    | ACBD5                      | -10.9 |
|                  | CLEC4A                                                                                                                                | 6    | CXCL2                      | -10.8 |
|                  | C12orf5                                                                                                                               | 6    | WT1                        | -10.7 |
|                  | MGEA5                                                                                                                                 | 6    | KIAA1430                   | -10.6 |
|                  | SCARNA20                                                                                                                              | 6    | INTS6                      | -10.6 |
|                  | PDZK1 /// PDZK1P1                                                                                                                     | 6    | EREG                       | -10.6 |
|                  | LOC101060503 /// TXNIP                                                                                                                | 6    | SH3BP2                     | -10.5 |
|                  | MIR22 /// MIR22HG                                                                                                                     | 6    | VPS54                      | -10.4 |
|                  | CHST7                                                                                                                                 | 6    | AGR3                       | -10.4 |
|                  | LOC100507577 /// LONP2                                                                                                                | 6    | SLC35G1                    | -10.3 |
|                  | POPD2C                                                                                                                                | 6    | CLASP2                     | -10.3 |
|                  | C18orf25                                                                                                                              | 6    | DMRTA2                     | -10.2 |
|                  | MOBP                                                                                                                                  | 6    | CDX1                       | -10.2 |
|                  | SERPINE1                                                                                                                              | 6    | UNC50                      | -10.2 |
|                  | CREBRF                                                                                                                                | 6    | MYC                        | -10.2 |
|                  | TP53INP1                                                                                                                              | 6    | TSEN2                      | -10.2 |
|                  | STX16                                                                                                                                 | 5    | UPRT                       | -10.1 |
|                  | ACTG1P4 /// AMY2A /// AMY2B                                                                                                           | 5    | PRR15L                     | -10.1 |
|                  | HIST1H2AK                                                                                                                             | 5    | KLHL13                     | -10.1 |
|                  | LRRC39                                                                                                                                | 5    | FAM169A                    | -10.1 |
|                  | DNHD1                                                                                                                                 | 5    | ZNF827                     | -9.9  |
|                  | FOXD4 /// FDXD4L1 /// FDXD4L3 /// FDXD4L6 /// LOC101060560                                                                            | 5    | E2F8                       | -9.9  |
|                  | CRYGS                                                                                                                                 | 5    | ZNF532                     | -9.9  |
|                  | CDKN2D                                                                                                                                | 5    | ELOVL6                     | -9.9  |
|                  | SECISBP2                                                                                                                              | 5    | TNFSF10                    | -9.9  |
|                  | ZNF791                                                                                                                                | 5    | SSTR1                      | -9.8  |
|                  | TGOLN2                                                                                                                                | 5    | UHRF1BP1                   | -9.8  |
|                  | DCAF4L1                                                                                                                               | 5    | RTN4P1                     | -9.8  |
|                  | OSBPL8                                                                                                                                | 5    | LXN                        | -9.8  |
|                  | KLF6                                                                                                                                  | 5    | FUND1                      | -9.7  |
|                  | TARDBP                                                                                                                                | 5    | DENND2D                    | -9.7  |
|                  | LEFTY1                                                                                                                                | 5    | ZHX2                       | -9.7  |
|                  | HIPK1                                                                                                                                 | 5    | DLG3                       | -9.7  |
|                  |                                                                                                                                       |      | STEAP1 /// STEAP1B         | -9.7  |

|                                                                            |      |
|----------------------------------------------------------------------------|------|
| NFIA                                                                       | -9.6 |
| PSMG4                                                                      | -9.5 |
| ADSS                                                                       | -9.5 |
| NSMCE4A                                                                    | -9.5 |
| DEPDC1                                                                     | -9.5 |
| MYADM                                                                      | -9.4 |
| TGIF2                                                                      | -9.4 |
| NDC1                                                                       | -9.4 |
| EPHX4                                                                      | -9.3 |
| SLC9A2                                                                     | -9.3 |
| CRLS1                                                                      | -9.3 |
| SLC38A1                                                                    | -9.2 |
| LGALS1                                                                     | -9.2 |
| KCTD20                                                                     | -9.2 |
| MTPAP                                                                      | -9.2 |
| CFL2                                                                       | -9.2 |
| METAP2                                                                     | -9.2 |
| MSH2                                                                       | -9.2 |
| CAPRIN1                                                                    | -9.2 |
| TACC2                                                                      | -9.2 |
| MAP3K5                                                                     | -9.2 |
| AGPS                                                                       | -9.2 |
| GPATCH2                                                                    | -9.1 |
| SQLE                                                                       | -9.1 |
| METTL21A                                                                   | -9.1 |
| ASCL2                                                                      | -9.1 |
| FASTKD2                                                                    | -9.0 |
| RAD51AP1                                                                   | -9.0 |
| PBDC1                                                                      | -9.0 |
| C4orf19                                                                    | -9.0 |
| TMEM68                                                                     | -9.0 |
| PRKD3                                                                      | -8.9 |
| ERBB2IP                                                                    | -8.8 |
| USP24                                                                      | -8.8 |
| TRIM2                                                                      | -8.8 |
| SRSF7                                                                      | -8.8 |
| RNF125                                                                     | -8.7 |
| UTP18                                                                      | -8.7 |
| C2CD4A                                                                     | -8.7 |
| SCLT1                                                                      | -8.7 |
| FUBP1                                                                      | -8.7 |
| FNBP1L                                                                     | -8.6 |
| PRKCH                                                                      | -8.6 |
| TJP2                                                                       | -8.6 |
| ZNF518A                                                                    | -8.6 |
| SNTB1                                                                      | -8.5 |
| NUDT12                                                                     | -8.5 |
| TRMT61B                                                                    | -8.5 |
| NAV2                                                                       | -8.5 |
| TOX                                                                        | -8.5 |
| MET                                                                        | -8.5 |
| RANBP2                                                                     | -8.5 |
| BRWD1                                                                      | -8.5 |
| KIN                                                                        | -8.5 |
| IPO8                                                                       | -8.4 |
| MDFC                                                                       | -8.4 |
| MIR17 /// MIR17HG /// MIR18A /// MIR19A /// MIR19B1 /// MIR20A /// MIR92A1 | -8.3 |
| MANSC1                                                                     | -8.3 |
| PLA2G3                                                                     | -8.3 |
| SRSF3                                                                      | -8.3 |
| LNX1                                                                       | -8.3 |
| C8orf44-SGK3 /// SGK3                                                      | -8.3 |
| GTF2H2 /// GTF2H2B /// GTF2H2C /// GTF2H2D                                 | -8.2 |
| DNAH14                                                                     | -8.2 |
| ZDHC23                                                                     | -8.2 |
| FGFBP1                                                                     | -8.2 |
| ARHGAP32                                                                   | -8.2 |
| STAMBPL1                                                                   | -8.2 |
| MOB1B                                                                      | -8.1 |
| CAND1                                                                      | -8.1 |
| AGO4                                                                       | -8.1 |
| LOC100190940                                                               | -8.1 |
| ABHD13                                                                     | -8.0 |
| CD58                                                                       | -8.0 |
| ORS1E1                                                                     | -8.0 |
| ARMC8                                                                      | -8.0 |
| DTWD1                                                                      | -8.0 |
| RRM2                                                                       | -8.0 |
| NCAPG                                                                      | -8.0 |
| UBE2J1                                                                     | -8.0 |
| LHFPL2                                                                     | -8.0 |
| BIVM                                                                       | -8.0 |
| MTHF5 /// ST20-MTHF5                                                       | -8.0 |
| C19orf12                                                                   | -8.0 |
| ATP2B1                                                                     | -7.8 |
| ZC3HAV1L                                                                   | -7.8 |
| C8orf4                                                                     | -7.8 |
| METTL8                                                                     | -7.8 |
| SREK1IP1                                                                   | -7.8 |
| FAM105A                                                                    | -7.8 |
| STXB96                                                                     | -7.7 |
| GTF2IRD1                                                                   | -7.7 |
| CDC14B                                                                     | -7.7 |
| PLA2G4A                                                                    | -7.7 |
| MYCL1                                                                      | -7.7 |
| OVOL2                                                                      | -7.6 |
| ZNF681                                                                     | -7.6 |
| PLSCR1                                                                     | -7.5 |
| SLC43A3                                                                    | -7.5 |
| EED                                                                        | -7.5 |
| NHLRC3                                                                     | -7.5 |
| BAG2                                                                       | -7.5 |
| NAA15                                                                      | -7.5 |
| GIMAP2                                                                     | -7.5 |
| UBE2Q2                                                                     | -7.5 |
| XRCC4                                                                      | -7.5 |
| ID4                                                                        | -7.5 |
| RPS6KB1                                                                    | -7.5 |
| SASS6                                                                      | -7.4 |
| DDX52                                                                      | -7.4 |
| RBM12                                                                      | -7.4 |
| MRPL15                                                                     | -7.4 |
| IFIH1                                                                      | -7.4 |
| BUB1B                                                                      | -7.4 |
| PLEKHA5                                                                    | -7.4 |

|                          |      |
|--------------------------|------|
| MYO1B                    | -7.4 |
| BCL11B                   | -7.4 |
| TCEAL8                   | -7.3 |
| LARP7                    | -7.3 |
| BRCA1                    | -7.3 |
| TMPO                     | -7.3 |
| CKAP4                    | -7.3 |
| CHML                     | -7.3 |
| TOMM40L                  | -7.3 |
| NAPEPLD                  | -7.3 |
| WDR36                    | -7.3 |
| KIF11                    | -7.3 |
| PHF2                     | -7.2 |
| GPR126                   | -7.2 |
| SKIV2L2                  | -7.2 |
| HIVEP1                   | -7.2 |
| ZFHX3                    | -7.2 |
| MMACHC                   | -7.2 |
| FAM13A                   | -7.1 |
| ANGEL2                   | -7.1 |
| MACC1                    | -7.1 |
| TCEAL1                   | -7.1 |
| EVA1A                    | -7.1 |
| PTPRB                    | -7.1 |
| EXO6                     | -7.1 |
| SMAD6                    | -7.1 |
| CASP1                    | -7.1 |
| NAMPT                    | -7.1 |
| GPR180                   | -7.1 |
| KRRX                     | -7.0 |
| SEH1L                    | -7.0 |
| RAP2C                    | -7.0 |
| PSMG1                    | -7.0 |
| ZMYM2                    | -7.0 |
| KCTD14 /// NDUFC2-KCTD14 | -7.0 |
| IQGAP2                   | -7.0 |
| PEX3                     | -7.0 |
| USP13                    | -7.0 |
| TET3                     | -6.9 |
| TIFA                     | -6.9 |
| SPIN2A /// SPIN2B        | -6.9 |
| SLC4A7                   | -6.9 |
| THUMP2D                  | -6.9 |
| HNRNPD                   | -6.9 |
| MK67                     | -6.9 |
| MT4                      | -6.8 |
| GTPBP8                   | -6.8 |
| ESRP1                    | -6.8 |
| IL20RA                   | -6.8 |
| TMEM216                  | -6.8 |
| CEBPD                    | -6.8 |
| ZNF689                   | -6.8 |
| PTGS2                    | -6.8 |
| KRIT1                    | -6.8 |
| PCDHB2                   | -6.7 |
| PNN                      | -6.7 |
| DCLRE1A                  | -6.7 |
| RAB28                    | -6.7 |
| PPP6C                    | -6.7 |
| OPA1                     | -6.7 |
| CAV2                     | -6.7 |
| ADAT2                    | -6.7 |
| PARP9                    | -6.7 |
| HNRNPU                   | -6.7 |
| TTF2                     | -6.6 |
| SIMC1                    | -6.6 |
| BCL2                     | -6.6 |
| GIN53                    | -6.6 |
| PSME4                    | -6.6 |
| EEF1E1                   | -6.6 |
| MBTPS2                   | -6.6 |
| PRLR                     | -6.6 |
| ZNF260                   | -6.6 |
| SP8                      | -6.6 |
| FUT4                     | -6.6 |
| TLK1                     | -6.5 |
| ZNF639                   | -6.5 |
| CFLAR                    | -6.5 |
| C15orf52                 | -6.5 |
| DSC2                     | -6.4 |
| ZNF248                   | -6.4 |
| HUNK                     | -6.4 |
| C9orf64                  | -6.4 |
| PWP1                     | -6.4 |
| OAS1                     | -6.4 |
| PATZ1                    | -6.4 |
| CSTF3                    | -6.4 |
| FDXACB1                  | -6.4 |
| CELF2                    | -6.4 |
| PTPN3                    | -6.4 |
| LIPG                     | -6.4 |
| CLDN1                    | -6.3 |
| KIAA1199                 | -6.3 |
| DEPTOR                   | -6.3 |
| HMG2A                    | -6.3 |
| PPP2R1B                  | -6.3 |
| ABHD12B /// MIR4454      | -6.3 |
| MAGOHB                   | -6.3 |
| SLC25A43                 | -6.3 |
| ITGB8                    | -6.3 |
| CRADD                    | -6.3 |
| TMEM30B                  | -6.3 |
| RPS14                    | -6.3 |
| ZBED1                    | -6.3 |
| TMEM168                  | -6.3 |
| RWDD3 /// TMEM56-RWDD3   | -6.3 |
| ZNF618                   | -6.3 |
| PHACTR2                  | -6.2 |
| BUB3                     | -6.2 |
| IGF2BP3                  | -6.2 |
| AKAP1                    | -6.2 |
| ATP1B1                   | -6.2 |
| ANKRD13C                 | -6.2 |
| QTRTD1                   | -6.2 |
| MAML3                    | -6.2 |

|                        |      |
|------------------------|------|
| VEZT                   | -6.2 |
| ERIC1                  | -6.1 |
| GHR                    | -6.1 |
| ITGA6                  | -6.1 |
| GLRX                   | -6.1 |
| SMARCAL1               | -6.1 |
| UCHL5                  | -6.1 |
| PTGER4                 | -6.1 |
| TMEM246                | -6.1 |
| SHANK2                 | -6.1 |
| SLC17A5                | -6.1 |
| METTL1                 | -6.1 |
| GPR39                  | -6.1 |
| LOC100509484 /// PLIN2 | -6.1 |
| PDS5B                  | -6.1 |
| KLHL7                  | -6.0 |
| TMEM56                 | -6.0 |
| TNS3                   | -6.0 |
| NUP35                  | -6.0 |
| FUT2                   | -6.0 |
| SNX9                   | -6.0 |
| NASP                   | -6.0 |
| TCERG1                 | -6.0 |
| PCGF6                  | -6.0 |
| ENPP4                  | -6.0 |
| DENND4C                | -6.0 |
| ZNF711                 | -6.0 |
| SENP7                  | -6.0 |
| KNSTRN                 | -6.0 |
| CFTR                   | -6.0 |
| PDE5A                  | -5.9 |
| NUDCD1                 | -5.9 |
| PRDM8                  | -5.9 |
| CLPX                   | -5.9 |
| RPAIN                  | -5.9 |
| XK                     | -5.9 |
| CD24                   | -5.9 |
| INPP1                  | -5.9 |
| C9orf40                | -5.9 |
| VASH2                  | -5.9 |
| IRS1                   | -5.9 |
| GJB2                   | -5.9 |
| ATP7B                  | -5.9 |
| PRDM16                 | -5.8 |
| ZNF32                  | -5.8 |
| NIF3L1                 | -5.8 |
| NF1                    | -5.8 |
| LYSMD2                 | -5.8 |
| KLHL42                 | -5.8 |
| ZMYM6 /// ZMYM6NB      | -5.8 |
| ZNF189                 | -5.8 |
| ELF2                   | -5.8 |
| NFIC                   | -5.8 |
| MND1                   | -5.8 |
| E2F5                   | -5.7 |
| PARP2                  | -5.7 |
| MTMR1                  | -5.7 |
| MPZL2                  | -5.7 |
| MCPH1                  | -5.7 |
| HEATR1                 | -5.7 |
| TBL1XR1                | -5.7 |
| SETD6                  | -5.7 |
| ZNF232                 | -5.7 |
| RQCD1                  | -5.6 |
| FYCO1                  | -5.6 |
| CCDC58                 | -5.6 |
| TRIM32                 | -5.6 |
| MDGA2                  | -5.6 |
| C1orf106               | -5.6 |
| PLCB4                  | -5.6 |
| RFC3                   | -5.6 |
| MKK                    | -5.6 |
| IVNS1ABP               | -5.6 |
| CAMK2N1                | -5.6 |
| ZBED6CL                | -5.6 |
| SBF2                   | -5.6 |
| TAFL5L                 | -5.6 |
| THRA                   | -5.6 |
| LEPROTL1               | -5.6 |
| SMIM3                  | -5.6 |
| AP4M1                  | -5.6 |
| SEMA3A                 | -5.6 |
| CHRA1                  | -5.5 |
| ASXL1                  | -5.5 |
| SRSF8                  | -5.5 |
| TMEM117                | -5.5 |
| BEND3                  | -5.5 |
| TLR3                   | -5.5 |
| PCDH814                | -5.5 |
| IL8                    | -5.5 |
| TRAPP13                | -5.5 |
| FNDC3A                 | -5.5 |
| ID2                    | -5.5 |
| EEPD1                  | -5.4 |
| KIAA1586               | -5.4 |
| SLC11A2                | -5.4 |
| SLTM                   | -5.4 |
| BET1                   | -5.4 |
| LDOC1L                 | -5.4 |
| HOMER1                 | -5.4 |
| LTV1                   | -5.4 |
| NR2C1                  | -5.4 |
| CDC7                   | -5.4 |
| MCM3                   | -5.4 |
| TAMM41                 | -5.4 |
| RAB27A                 | -5.4 |
| PPM1A                  | -5.4 |
| NUP98                  | -5.4 |
| DTX3L                  | -5.4 |
| IRAK1BP1               | -5.3 |
| IMPACT                 | -5.3 |
| DDX60                  | -5.3 |
| MON2                   | -5.3 |
| KIAA0391               | -5.3 |
| YAP1                   | -5.3 |

|                                       |      |
|---------------------------------------|------|
| ERLEC1                                | -5.3 |
| GGA2                                  | -5.3 |
| ISCA1                                 | -5.3 |
| ARID2                                 | -5.3 |
| GNAIL                                 | -5.3 |
| CTPS2                                 | -5.3 |
| TBC1D9                                | -5.3 |
| ZW10                                  | -5.3 |
| TOX3                                  | -5.3 |
| ZFYVE16                               | -5.3 |
| SLC37A1                               | -5.3 |
| MRPS31                                | -5.3 |
| SMPDL3A                               | -5.3 |
| GPRC5A                                | -5.3 |
| COX20                                 | -5.3 |
| TRAK2                                 | -5.2 |
| AJUBA                                 | -5.2 |
| BBX                                   | -5.2 |
| RNF2                                  | -5.2 |
| PIK3AP1                               | -5.2 |
| PVRL3                                 | -5.2 |
| TM7SF3                                | -5.2 |
| SUV420H1                              | -5.2 |
| POLA2                                 | -5.2 |
| SH3RF3                                | -5.2 |
| TBC1D8B                               | -5.2 |
| HNRNPD                                | -5.2 |
| TMEM39A                               | -5.2 |
| SAP30                                 | -5.2 |
| DENND5B                               | -5.2 |
| DIMT1                                 | -5.2 |
| RNF145                                | -5.2 |
| CSR2BP /// PET117                     | -5.2 |
| NUP88                                 | -5.2 |
| SH3RF2                                | -5.2 |
| NEDD4                                 | -5.2 |
| RPGR                                  | -5.2 |
| XIAP                                  | -5.2 |
| STAU2                                 | -5.2 |
| TRIB2                                 | -5.2 |
| YARS2                                 | -5.2 |
| NFKB1                                 | -5.2 |
| IFT81                                 | -5.2 |
| TIPIN                                 | -5.2 |
| RIF1                                  | -5.2 |
| ICK                                   | -5.2 |
| DOCK9                                 | -5.1 |
| IFT74                                 | -5.1 |
| FAR2                                  | -5.1 |
| ANKRD32                               | -5.1 |
| RNF138                                | -5.1 |
| AKAP2 /// PALM2-AKAP2                 | -5.1 |
| RNF144A                               | -5.1 |
| SRP19                                 | -5.1 |
| RAB11FIP2                             | -5.1 |
| PPP4R1                                | -5.1 |
| ROCK2                                 | -5.1 |
| ZNF641                                | -5.1 |
| LYPLAL1                               | -5.1 |
| SENP6                                 | -5.1 |
| TMEM218                               | -5.1 |
| UNC93A                                | -5.1 |
| LURAP1L                               | -5.0 |
| UTP20                                 | -5.0 |
| KIF21A                                | -5.0 |
| QRS1                                  | -5.0 |
| MYEOV                                 | -5.0 |
| GNPTAB                                | -5.0 |
| IBTK                                  | -5.0 |
| LPPR1                                 | -5.0 |
| AGFG1                                 | -5.0 |
| PRKAA1                                | -5.0 |
| ZNF321P /// ZNF816 /// ZNF816-ZNF321P | -5.0 |
| ZNF608                                | -5.0 |
| CCDC50                                | -5.0 |
| SNX13                                 | -5.0 |

## Ivermectin vs. Control

| UP                        | DOWN                             |
|---------------------------|----------------------------------|
| CASP5 37.8                | MT4 -24.6                        |
| RAB39B 28.1               | CKCL5 -21.5                      |
| ATF3 24.9                 | FGFBP1 -16.1                     |
| DDIT3 24.8                | UGT2B15 -16.0                    |
| BEX2 24.5                 | HMGB3 -15.5                      |
| ISG20 21.4                | PTGDR -15.1                      |
| IFIT1 18.5                | PTPRO -14.1                      |
| OASL 16.7                 | OLFMM -13.4                      |
| IRF9 16.6                 | SMAD6 -10.8                      |
| PEAR1 16.4                | C10orf99 -10.3                   |
| JL1A 15.9                 | ORS1E1 -9.4                      |
| CDKN2B 12.4               | ID1 -8.6                         |
| EGR1 11.1                 | INSIG1 -8.4                      |
| FILP1L 10.6               | EPHB3 -8.4                       |
| GADD45A 10.2              | ID4 -8.3                         |
| TSUP 9.8                  | PLA2G3 -8.1                      |
| C8orf4 9.3                | CYBS8 -7.6                       |
| H1FO 9.3                  | CCNE2 -7.0                       |
| IFIT2 8.9                 | MIR636 /// SRSF2 -6.8            |
| ANXA1 8.9                 | FAM198B -6.7                     |
| IFI44 8.6                 | SLC39A10 -6.5                    |
| FAM129A 8.6               | FABP1 /// PRDM10 -6.5            |
| VIMP 8.4                  | KIAA0101 -6.4                    |
| SLC22A15 8.0              | SMOC2 -6.3                       |
| ZFAND2A 7.9               | H3F3A /// H3F3B /// MIR4738 -6.1 |
| HKDC1 7.9                 | CCNE1 -6.0                       |
| WIP1 7.7                  | LGR5 -6.0                        |
| ZNF222 7.6                | MCM3 -6.0                        |
| SPINK1 7.6                | HMGB1 -5.9                       |
| CLGN 7.4                  | HNRNPJ -5.9                      |
| AREG /// AREGB 7.3        | ADRA2A -5.6                      |
| FBXO16 7.2                | ETS2 -5.6                        |
| XDH 6.8                   | C2CD4A -5.5                      |
| C6orf223 6.8              | ISX -5.4                         |
| HSPA13 6.8                | ATP5G3 -5.4                      |
| FGF21 6.4                 | SRSF11 -5.3                      |
| GDF15 6.3                 | DEFA6 -5.3                       |
| SERPIN8 6.3               | HSPA1A /// HSPA1B -5.3           |
| MIR22 /// MIR22HG 6.3     | POZD2 -5.3                       |
| ARMCK3 6.3                | MYBL1 -5.2                       |
| GTPBP2 6.2                | ID2 -5.2                         |
| NFIL3 6.2                 | RASL11A -5.1                     |
| CREB5 6.0                 | GINS2 -5.1                       |
| PECR 6.0                  | MYB -5.1                         |
| PTPRH 5.9                 | FAM111B -5.0                     |
| ZCCHC2 5.9                | METTL7A -5.0                     |
| LRRC2 5.8                 | CYTIP -5.0                       |
| TRIB3 5.8                 | LYZ -5.0                         |
| SEPP1 5.8                 |                                  |
| INHBE 5.8                 |                                  |
| MYH4 5.7                  |                                  |
| SLC30A1 5.7               |                                  |
| DAPP1 5.7                 |                                  |
| CREB5 /// LOC401317 5.6   |                                  |
| LAMP3 5.5                 |                                  |
| SELM 5.4                  |                                  |
| DNAJB9 5.4                |                                  |
| CALCA 5.4                 |                                  |
| ARHGAP29 5.3              |                                  |
| FOS 5.2                   |                                  |
| TMEM39A 5.2               |                                  |
| SQSTM1 5.1                |                                  |
| LYPD6B 5.1                |                                  |
| FKBP14 5.1                |                                  |
| IRF7 5.1                  |                                  |
| GK 5.1                    |                                  |
| CHD2 /// LOC100507217 5.1 |                                  |
| TMEM154 5.1               |                                  |
| GADD45G 5.0               |                                  |
| RWDD2A 5.0                |                                  |
| CYP39A1 5.0               |                                  |
